# Supplementary material for: Random projections and kernelised leave one cluster out cross validation: universal baselines and evaluation tools for supervised machine learning of material properties
Source: Royal Society of Chemistry journal article supplement (doi:10.1039/d2dd00039c), 2022-01-01
Supplement: d2dd00039c1.pdf [file d2dd00039c1.pdf]

# *Random Projections* and kernelised leave one cluster out cross validation: Universal baselines and evaluation tools for supervised machine learning of material properties: Supporting information

Samantha Durdy

Michael Gaultois

Vladimir Gusev

Danushka Bollegala

Matthew J. Rosseinsky

## S1 Normalising inputs for kernel methods

Various normalisation methods were tested in order to justify those used in the results reported. As skewed  $\chi^2$  and additive  $\chi^2$  are only well defined for a positive input, data was scaled between 0 and 1 using min-max normalisation before use with these functions.

When performing K-means clustering with either the radial basis function (RBF) or no kernel method at all (the identity function), the following normalisation methods were considered:

- *l2*: l2 normalisation.
- *min-max -1:1*: Min-max normalisation to scale data between -1 and 1.
- *min-max 0:1*: Min-max normalisation to scale data between 0 and 1.
- *standard*: Standardisation of each dimension to mean 0 and unit variance.
- *none*: No normalisation method.

Every dataset tested in sections 3.2 and 3.3 was normalised using each normalisation method. Normalised data were then used as input to RBF and the identity function, the resulting data was then clustered using K-means clustering ( $K$  used between 2 and 10 inclusive). For each kernel, dataset, and value of  $K$ , the normalisation method which resulted in the lowest standard deviation between cluster sizes (cluster size unevenness) was recorded. Normalisation methods which most frequently results in the lowest cluster size unevenness were used in the results reported in the main text. For RBF no normalisation was used, and when testing without a kernel data was scaled between -1 and 1 using min-max scaling (fig. S1).

## S2 Experiments in repeatability

As the k-means clustering part of LOCO-CV (and kernelised LOCO-CV) is non-deterministic, experiments were carried out to investigate whether this would significantly impact the repeatability metrics taken using these techniques. All tasks investigated in section 3.1 were repeated 5 times for all representations measured which have less than 500 dimensions (as larger representations were prohibitively expensive to train multiple times). Exclusion of representations larger than 500 dimensions meant that the representations investigated for these experiments in repeatability were:

- *magpie* (88 dimensions)
- *CompVec* (119 dimensions)
- *Oliynyk* (176 dimensions)
- *Random Projection* (88 dimensions)
- *Random Projection* (119 dimensions)
- *Random Projection* (176 dimensions)

Random forests trained using these representations were evaluated with LOCO-CV, kernelised LOCO-CV and a traditional 80%/20% train/test split. By comparing the standard deviations of measurements across different repeats of a task, it is possible to compare the repeatability of LOCO-CV and kernelised LOCO-CV to that of an 80/20 80%/20% train/test split. Clustering for LOCO-CV and kernelised LOCO-CV in these experiments was done using *magpie* representation (as in section 3.1).

In both regression and classification results radial basis function application improved the repeatability of LOCO-CV (fig. S2, tables S1-S6). While LOCO-CV and kernelised LOCO-CV are both less repeatable than a 80%/20% train/test split, the decrease in reliability is small enough to not substantially impact the interpretation of results.

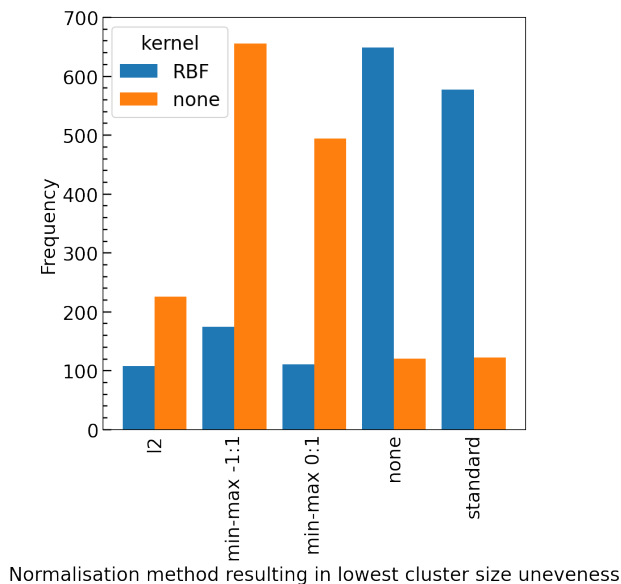

Figure S1: The frequency for which different normalisation methods resulted in the lowest cluster size unevenness (standard deviation in cluster size), grouped by kernel usage.

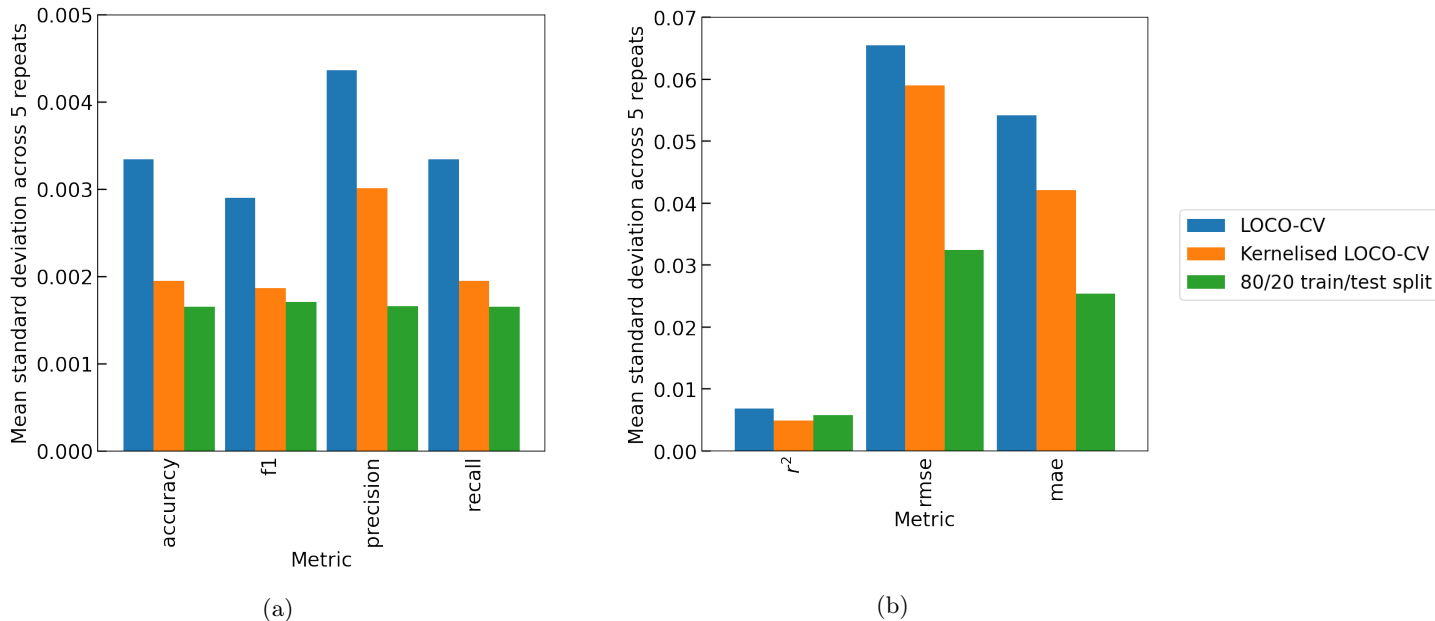

Figure S2: The standard deviation of LOCO-CV, kernelised LOCO-CV, and 80/20 train test split scores for 5 repeats of a task. The mean of these standard deviations is taken across all tasks and all representations. Tasks tested here are all those explored in section 3.1, and representations are those explored in section 3.1 which are less than 500 dimensions. (a) Standard deviation of performance in classification tasks across 5 repeats. Further breakdowns of these data can be seen in tables S1-S3. (b) Standard deviation of performance in regression tasks across 5 repeats. Further breakdowns of these data can be seen in tables S4-S6. As  $r^2$  is unbounded below 0, results shown here is calculated by excluding and  $r^2$  measurement less than 0.

| task         | CBFV              | dimensions | accuracy  |          | f1        |          | precision |          | recall    |          |
|--------------|-------------------|------------|-----------|----------|-----------|----------|-----------|----------|-----------|----------|
|              |                   |            | $\bar{x}$ | $\sigma$ | $\bar{x}$ | $\sigma$ | $\bar{x}$ | $\sigma$ | $\bar{x}$ | $\sigma$ |
| $T_c > 10K$  | <i>magpie</i>     | 88         | 0.92      | 0.0013   | 0.92      | 0.0013   | 0.92      | 0.0012   | 0.92      | 0.0013   |
|              | <i>CompVec</i>    | 119        | 0.92      | 0.0019   | 0.92      | 0.0019   | 0.92      | 0.0019   | 0.92      | 0.0019   |
|              | <i>Oliynyk</i>    | 176        | 0.92      | 0.0011   | 0.92      | 0.0011   | 0.92      | 0.0011   | 0.92      | 0.0011   |
|              | <i>Random</i>     | 88         | 0.91      | 0.0016   | 0.91      | 0.0016   | 0.91      | 0.0016   | 0.91      | 0.0016   |
|              | <i>Projection</i> | 119        | 0.91      | 0.00067  | 0.91      | 0.00068  | 0.91      | 0.0007   | 0.91      | 0.00067  |
|              |                   |            | 176       | 0.91     | 0.0012    | 0.91     | 0.0012    | 0.91     | 0.0012    | 0.91     |
| GFA          | <i>magpie</i>     | 88         | 0.88      | 0.0028   | 0.88      | 0.0029   | 0.88      | 0.0027   | 0.88      | 0.0028   |
|              | <i>CompVec</i>    | 119        | 0.88      | 0.0049   | 0.88      | 0.005    | 0.88      | 0.0049   | 0.88      | 0.0049   |
|              | <i>Oliynyk</i>    | 176        | 0.88      | 0.003    | 0.88      | 0.003    | 0.88      | 0.003    | 0.88      | 0.003    |
|              | <i>Random</i>     | 88         | 0.87      | 0.0033   | 0.87      | 0.0034   | 0.87      | 0.0033   | 0.87      | 0.0033   |
|              | <i>Projection</i> | 119        | 0.87      | 0.004    | 0.87      | 0.0042   | 0.87      | 0.0039   | 0.87      | 0.004    |
|              |                   |            | 176       | 0.87     | 0.0017    | 0.87     | 0.0017    | 0.87     | 0.0018    | 0.87     |
| HH stability | <i>magpie</i>     | 88         | 1.0       | 0.0      | 0.99      | 0.0      | 1.0       | 0.0      | 1.0       | 0.0      |
|              | <i>CompVec</i>    | 119        | 0.99      | 0.00024  | 0.99      | 0.00041  | 0.99      | 0.00024  | 0.99      | 0.00024  |
|              | <i>Oliynyk</i>    | 176        | 0.99      | 0.00045  | 0.99      | 0.00058  | 0.99      | 0.00044  | 0.99      | 0.00045  |
|              | <i>Random</i>     | 88         | 0.99      | 0.0      | 0.99      | 0.0      | 0.99      | 0.0      | 0.99      | 0.0      |
|              | <i>Projection</i> | 119        | 0.99      | 0.0      | 0.98      | 0.0      | 0.99      | 0.0      | 0.99      | 0.0      |
|              |                   |            | 176       | 0.99     | 0.00024   | 0.99     | 0.00049   | 0.99     | 0.00024   | 0.99     |

Table S1: The mean and standard deviation of various metrics of classification tasks across 5 repeats measured using an 80/20 train/test fit. Note that for the HH stability task, the highly unbalanced nature of the dataset results in unusually repeatable and high performing results.

| task         | CBFV              | dimensions | accuracy  |          | f1        |          | precision |          | recall    |          |
|--------------|-------------------|------------|-----------|----------|-----------|----------|-----------|----------|-----------|----------|
|              |                   |            | $\bar{x}$ | $\sigma$ | $\bar{x}$ | $\sigma$ | $\bar{x}$ | $\sigma$ | $\bar{x}$ | $\sigma$ |
| $T_c > 10K$  | <i>magpie</i>     | 88         | 0.82      | 0.00092  | 0.81      | 0.0016   | 0.82      | 0.0015   | 0.82      | 0.00092  |
|              | <i>CompVec</i>    | 119        | 0.84      | 0.00045  | 0.83      | 0.00024  | 0.83      | 0.00019  | 0.84      | 0.00045  |
|              | <i>Oliynyk</i>    | 176        | 0.82      | 0.0016   | 0.80      | 0.0020   | 0.82      | 0.0024   | 0.82      | 0.0016   |
|              | <i>Random</i>     | 88         | 0.64      | 0.0014   | 0.53      | 0.0022   | 0.64      | 0.012    | 0.64      | 0.0014   |
|              | <i>Projection</i> | 119        | 0.64      | 0.0012   | 0.53      | 0.0014   | 0.65      | 0.012    | 0.64      | 0.0012   |
|              |                   |            | 176       | 0.64     | 0.0012    | 0.53     | 0.0015    | 0.65     | 0.014     | 0.64     |
| GFA          | <i>magpie</i>     | 88         | 0.64      | 0.011    | 0.64      | 0.0081   | 0.70      | 0.0046   | 0.64      | 0.011    |
|              | <i>CompVec</i>    | 119        | 0.72      | 0.0017   | 0.72      | 0.0018   | 0.75      | 0.0033   | 0.72      | 0.0017   |
|              | <i>Oliynyk</i>    | 176        | 0.65      | 0.0069   | 0.66      | 0.0046   | 0.71      | 0.0032   | 0.65      | 0.0069   |
|              | <i>Random</i>     | 88         | 0.53      | 0.0083   | 0.50      | 0.0064   | 0.61      | 0.0027   | 0.53      | 0.0083   |
|              | <i>Projection</i> | 119        | 0.53      | 0.011    | 0.49      | 0.0091   | 0.62      | 0.010    | 0.53      | 0.011    |
|              |                   |            | 176       | 0.52     | 0.012     | 0.49     | 0.010     | 0.61     | 0.0057    | 0.52     |
| HH stability | <i>magpie</i>     | 88         | 0.98      | 0.00041  | 0.98      | 0.00036  | 0.97      | 0.00037  | 0.98      | 0.00041  |
|              | <i>CompVec</i>    | 119        | 0.97      | 0.00045  | 0.97      | 0.00038  | 0.97      | 0.00078  | 0.97      | 0.00045  |
|              | <i>Oliynyk</i>    | 176        | 0.98      | 0.00039  | 0.97      | 0.00034  | 0.97      | 0.00050  | 0.98      | 0.00039  |
|              | <i>Random</i>     | 88         | 0.97      | 0.00055  | 0.96      | 0.00070  | 0.95      | 0.0019   | 0.97      | 0.00055  |
|              | <i>Projection</i> | 119        | 0.97      | 0.00048  | 0.96      | 0.00067  | 0.95      | 0.0015   | 0.97      | 0.00048  |
|              |                   |            | 176       | 0.97     | 0.00042   | 0.96     | 0.00057   | 0.96     | 0.0017    | 0.97     |

Table S2: The mean and standard deviation of various metrics of classification tasks across 5 repeats measured using LOCO-CV without any kernels

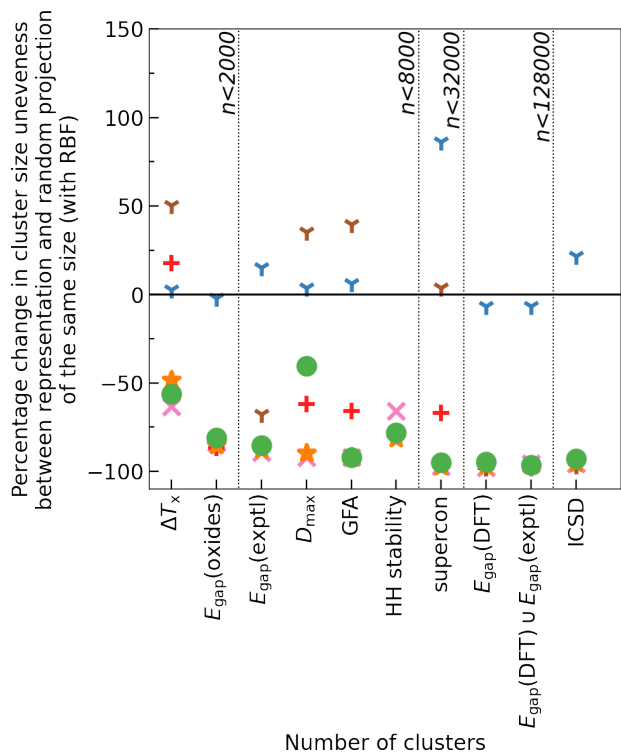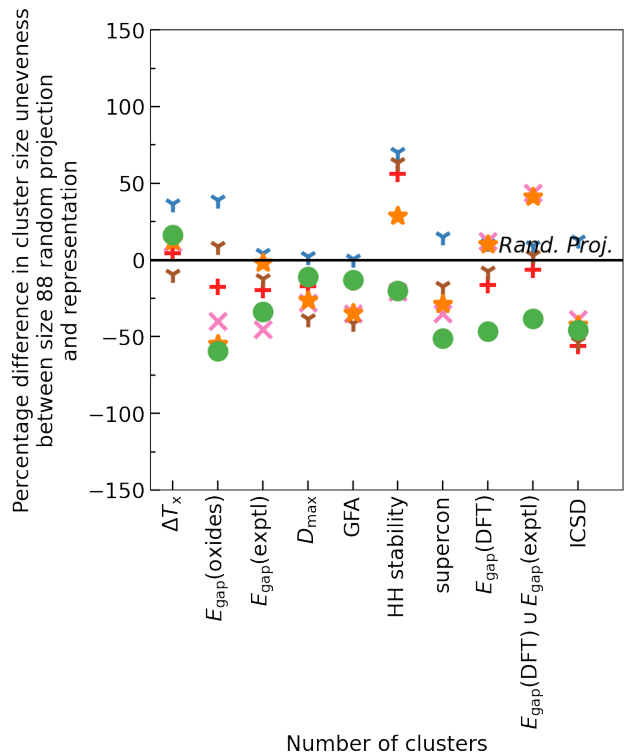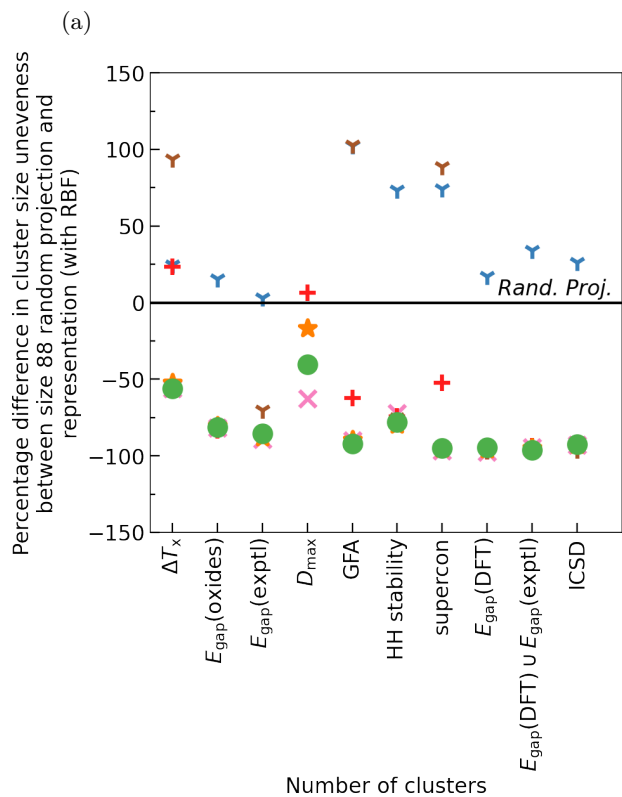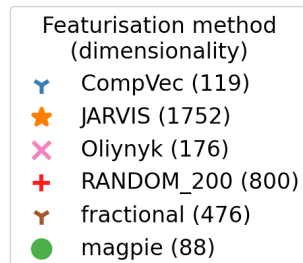

(a)

(b)

(c)

Figure S3: Performance advantage of different CBFVs against *Random Projections* of composition vectors across different datasets as measured by cluster size unevenness (standard deviation in cluster size) (a) CBFVs are compared with *Random Projections* of equal size and a RBF kernel is applied. (b) CBFVs are compared to *Random Projection* of size 88 with no kernel applied (c) CBFVs are compared to *Random Projection* of size 88 with a RBF kernel applied

| task         | CBFV              | dimensions | accuracy  |          | f1        |          | precision |          | recall    |          |
|--------------|-------------------|------------|-----------|----------|-----------|----------|-----------|----------|-----------|----------|
|              |                   |            | $\bar{x}$ | $\sigma$ | $\bar{x}$ | $\sigma$ | $\bar{x}$ | $\sigma$ | $\bar{x}$ | $\sigma$ |
| $T_c > 10K$  | <i>magpie</i>     | 88         | 0.91      | 0.000 43 | 0.91      | 0.000 43 | 0.91      | 0.000 43 | 0.91      | 0.000 43 |
|              | <i>CompVec</i>    | 119        | 0.91      | 0.000 47 | 0.91      | 0.000 47 | 0.91      | 0.000 48 | 0.91      | 0.000 47 |
|              | <i>Oliynyk</i>    | 176        | 0.91      | 0.000 59 | 0.91      | 0.000 60 | 0.91      | 0.000 61 | 0.91      | 0.000 59 |
|              | <i>Random</i>     | 88         | 0.68      | 0.0019   | 0.58      | 0.0028   | 0.74      | 0.0097   | 0.68      | 0.0019   |
|              | <i>Projection</i> | 119        | 0.68      | 0.0017   | 0.58      | 0.0027   | 0.74      | 0.0087   | 0.68      | 0.0017   |
|              |                   | 176        | 0.68      | 0.0017   | 0.58      | 0.0027   | 0.74      | 0.0066   | 0.68      | 0.0017   |
| GFA          | <i>magpie</i>     | 88         | 0.88      | 0.000 58 | 0.87      | 0.000 60 | 0.88      | 0.000 57 | 0.88      | 0.000 58 |
|              | <i>CompVec</i>    | 119        | 0.88      | 0.0011   | 0.88      | 0.0011   | 0.88      | 0.0011   | 0.88      | 0.0011   |
|              | <i>Oliynyk</i>    | 176        | 0.88      | 0.000 72 | 0.88      | 0.000 72 | 0.88      | 0.000 66 | 0.88      | 0.000 72 |
|              | <i>Random</i>     | 88         | 0.55      | 0.0054   | 0.51      | 0.0039   | 0.61      | 0.0056   | 0.55      | 0.0054   |
|              | <i>Projection</i> | 119        | 0.54      | 0.010    | 0.51      | 0.0080   | 0.61      | 0.0056   | 0.54      | 0.010    |
|              |                   | 176        | 0.53      | 0.0065   | 0.51      | 0.0050   | 0.61      | 0.0049   | 0.53      | 0.0065   |
| HH stability | <i>magpie</i>     | 88         | 0.98      | 0.000 29 | 0.98      | 0.000 34 | 0.98      | 0.000 30 | 0.98      | 0.000 29 |
|              | <i>CompVec</i>    | 119        | 0.97      | 0.000 32 | 0.97      | 0.000 34 | 0.97      | 0.000 49 | 0.97      | 0.000 32 |
|              | <i>Oliynyk</i>    | 176        | 0.98      | 0.000 43 | 0.98      | 0.000 37 | 0.98      | 0.000 46 | 0.98      | 0.000 43 |
|              | <i>Random</i>     | 88         | 0.97      | 0.000 88 | 0.96      | 0.0012   | 0.96      | 0.0027   | 0.97      | 0.000 88 |
|              | <i>Projection</i> | 119        | 0.97      | 0.000 74 | 0.95      | 0.0011   | 0.95      | 0.0022   | 0.97      | 0.000 74 |
|              |                   | 176        | 0.97      | 0.000 80 | 0.96      | 0.0012   | 0.95      | 0.0029   | 0.97      | 0.000 80 |

Table S3: The mean and standard deviation of various metrics of classification tasks across 5 repeats measured using kernelised LOCO-CV (using radial basis function kernel)

### S3 Further observations on case studies

For each machine learning task investigated we attempted to recreate the representation used in that study, and train a random forest on this representation to compare to representations investigated in Section 3.1. When recreation proved infeasible, alternatives have been noted. Full tables of results for each case study are provided, including leave one cluster out cross validation (LOCO-CV) and kernelised LOCO-CV measurements (tables S7-S17). The featurisation used in K-means clustering for LOCO-CV and kernelised LOCO-CV measurements was done using *magpie* representation, as it generally demonstrated balanced clustering across the datasets and tasks investigated here (fig. 6a), and resulted in more models learning trends more consistently (fig. 8b).

As noted in the main text, these papers were selected for interesting use of machine learning (ML), not for the choice of representation which was used in each paper. Several of these case studies mention that representation could be improved through further feature selection and none make any claims that their representation is advantageous over existing other representations (such as those discussed examined in section 3.1).

#### S3.1 Machine learning modelling of superconducting critical temperature (2018)

This study uses data from the Japanese National Institute of Materials Science superconductivity dataset (total training set size 13077) [7]. They use random forests to predict superconducting critical temperature ( $T_c$ ) in three contexts:

- $T_c$ : Using a regressor to predict the superconducting critical temperature ( $T_c$ ) of a material.
- $T_c > 10K$ : Classifying if the  $T_c$  of a material is greater than 10 K.
- $T_c | (T_c > 10K)$ : Regressing to find  $T_c$  given  $T_c > 10K$ .

The authors of this study derive a custom CBFV from the *magpie* package. In recreating all three of the above tasks, their custom CBFV performs similar to the CBFVs investigated in section 3.1 (tables S7 to S9). This is in line with the suggestion that a dataset of this size will see little benefit from domain knowledge. Due to limited reproducibility our results are compared to their results as published, rather than as recreated.

| task                                                           | CBFV              | dimensions | $r^2$     |          | rmse      |          | mae       |          |
|----------------------------------------------------------------|-------------------|------------|-----------|----------|-----------|----------|-----------|----------|
|                                                                |                   |            | $\bar{x}$ | $\sigma$ | $\bar{x}$ | $\sigma$ | $\bar{x}$ | $\sigma$ |
| $D_{\max}$                                                     | <i>magpie</i>     | 88         | 0.68      | 0.020    | 0.97      | 0.031    | 0.27      | 0.0057   |
|                                                                | <i>CompVec</i>    | 119        | 0.65      | 0.014    | 1.0       | 0.020    | 0.27      | 0.0032   |
|                                                                | <i>Oliytryk</i>   | 176        | 0.61      | 0.018    | 1.1       | 0.025    | 0.29      | 0.0039   |
|                                                                | <i>Random</i>     | 88         | 0.56      | 0.029    | 1.1       | 0.037    | 0.40      | 0.0069   |
|                                                                | <i>Projection</i> | 119        | 0.63      | 0.012    | 1.0       | 0.017    | 0.38      | 0.0057   |
|                                                                |                   |            | 176       | 0.61     | 0.019     | 1.1      | 0.027     | 0.39     |
| $E_{\text{gap}}(\text{DFT}) \cup E_{\text{gap}}(\text{exptl})$ | <i>magpie</i>     | 88         | 0.77      | 0.00093  | 0.77      | 0.0016   | 0.52      | 0.00096  |
|                                                                | <i>CompVec</i>    | 119        | 0.63      | 0.0011   | 0.98      | 0.0015   | 0.68      | 0.0015   |
|                                                                | <i>Oliytryk</i>   | 176        | 0.78      | 0.0012   | 0.76      | 0.0021   | 0.51      | 0.00070  |
|                                                                | <i>Random</i>     | 88         | 0.54      | 0.0012   | 1.1       | 0.0014   | 0.83      | 0.0010   |
|                                                                | <i>Projection</i> | 119        | 0.54      | 0.0012   | 1.1       | 0.0014   | 0.83      | 0.0012   |
|                                                                |                   |            | 176       | 0.56     | 0.0023    | 1.1      | 0.0027    | 0.81     |
| $E_{\text{gap}}(\text{DFT})$                                   | <i>magpie</i>     | 88         | 0.77      | 0.0012   | 0.79      | 0.0021   | 0.52      | 0.00076  |
|                                                                | <i>CompVec</i>    | 119        | 0.66      | 0.0018   | 0.96      | 0.0025   | 0.66      | 0.0016   |
|                                                                | <i>Oliytryk</i>   | 176        | 0.78      | 0.0013   | 0.78      | 0.0022   | 0.51      | 0.00058  |
|                                                                | <i>Random</i>     | 88         | 0.54      | 0.00093  | 1.1       | 0.0011   | 0.84      | 0.0010   |
|                                                                | <i>Projection</i> | 119        | 0.54      | 0.0015   | 1.1       | 0.0018   | 0.84      | 0.0019   |
|                                                                |                   |            | 176       | 0.56     | 0.0027    | 1.1      | 0.0034    | 0.82     |
| $E_{\text{gap}}(\text{exptl})$                                 | <i>magpie</i>     | 88         | 0.84      | 0.0032   | 0.63      | 0.0065   | 0.43      | 0.0023   |
|                                                                | <i>CompVec</i>    | 119        | 0.68      | 0.0052   | 0.91      | 0.0074   | 0.56      | 0.0044   |
|                                                                | <i>Oliytryk</i>   | 176        | 0.84      | 0.0035   | 0.64      | 0.0069   | 0.43      | 0.0021   |
|                                                                | <i>Random</i>     | 88         | 0.51      | 0.0060   | 1.1       | 0.0068   | 0.68      | 0.0045   |
|                                                                | <i>Projection</i> | 119        | 0.58      | 0.0069   | 1.0       | 0.0085   | 0.64      | 0.0075   |
|                                                                |                   |            | 176       | 0.61     | 0.0059    | 1.0      | 0.0076    | 0.65     |
| $E_{\text{gap}}(\text{oxides})$                                | <i>magpie</i>     | 88         | 0.71      | 0.0054   | 1.3       | 0.012    | 0.94      | 0.0081   |
|                                                                | <i>CompVec</i>    | 119        | 0.36      | 0.019    | 1.9       | 0.027    | 1.4       | 0.022    |
|                                                                | <i>Oliytryk</i>   | 176        | 0.76      | 0.0051   | 1.1       | 0.012    | 0.86      | 0.012    |
|                                                                | <i>Random</i>     | 88         | 0.35      | 0.015    | 1.9       | 0.021    | 1.5       | 0.012    |
|                                                                | <i>Projection</i> | 119        | 0.27      | 0.011    | 2.0       | 0.014    | 1.6       | 0.016    |
|                                                                |                   |            | 176       | 0.35     | 0.0099    | 1.9      | 0.014     | 1.5      |
| $T_c   (T_c > 10\text{K})$                                     | <i>magpie</i>     | 88         | 0.87      | 0.00084  | 10        | 0.034    | 6.3       | 0.039    |
|                                                                | <i>CompVec</i>    | 119        | 0.86      | 0.0016   | 11        | 0.061    | 6.4       | 0.045    |
|                                                                | <i>Oliytryk</i>   | 176        | 0.88      | 0.00034  | 10        | 0.014    | 6.2       | 0.028    |
|                                                                | <i>Random</i>     | 88         | 0.84      | 0.0018   | 12        | 0.064    | 7.0       | 0.050    |
|                                                                | <i>Projection</i> | 119        | 0.86      | 0.0010   | 11        | 0.040    | 6.8       | 0.012    |
|                                                                |                   |            | 176       | 0.85     | 0.0016    | 11       | 0.061     | 6.8      |
| $T_c$                                                          | <i>magpie</i>     | 88         | 0.83      | 0.0013   | 11        | 0.041    | 5.4       | 0.018    |
|                                                                | <i>CompVec</i>    | 119        | 0.82      | 0.00079  | 11        | 0.025    | 5.2       | 0.015    |
|                                                                | <i>Oliytryk</i>   | 176        | 0.83      | 0.00047  | 11        | 0.015    | 5.3       | 0.021    |
|                                                                | <i>Random</i>     | 88         | 0.81      | 0.00097  | 12        | 0.030    | 5.9       | 0.024    |
|                                                                | <i>Projection</i> | 119        | 0.81      | 0.0013   | 12        | 0.040    | 5.9       | 0.019    |
|                                                                |                   |            | 176       | 0.80     | 0.0018    | 12       | 0.055     | 5.9      |
| $\Delta T_x$                                                   | <i>magpie</i>     | 88         | 0.60      | 0.0049   | 14        | 0.086    | 11        | 0.040    |
|                                                                | <i>CompVec</i>    | 119        | 0.65      | 0.011    | 13        | 0.20     | 10        | 0.19     |
|                                                                | <i>Oliytryk</i>   | 176        | 0.60      | 0.0058   | 14        | 0.10     | 11        | 0.044    |
|                                                                | <i>Random</i>     | 88         | 0.67      | 0.0060   | 13        | 0.12     | 9.9       | 0.14     |
|                                                                | <i>Projection</i> | 119        | 0.67      | 0.0069   | 13        | 0.13     | 10        | 0.18     |
|                                                                |                   |            | 176       | 0.65     | 0.0063    | 13       | 0.12      | 10       |

Table S4: The mean ( $\bar{x}$ ) and standard deviation ( $\sigma$ ) of  $r^2$ , mean squared error (mse), root mean squared error (rmse) and mean absolute error (mae) of regression tasks across 5 repeats measured using an 80/20 train/test split. Unlike tables S5 and S6, none of the  $r^2$  values found using this method were less than 0.

| task                                                           | CBFV              | dimensions | $r^2$     |          | rmse      |          | mae       |          |
|----------------------------------------------------------------|-------------------|------------|-----------|----------|-----------|----------|-----------|----------|
|                                                                |                   |            | $\bar{x}$ | $\sigma$ | $\bar{x}$ | $\sigma$ | $\bar{x}$ | $\sigma$ |
| $D_{\max}$                                                     | <i>magpie</i>     | 88         | -15       |          | 2.1       | 0.018    | 1.2       | 0.015    |
|                                                                | <i>CompVec</i>    | 119        | -7.4      |          | 2.0       | 0.027    | 0.78      | 0.013    |
|                                                                | <i>Oliyntyk</i>   | 176        | -21       |          | 2.6       | 0.039    | 1.6       | 0.021    |
|                                                                | <i>Random</i>     | 88         | -510      |          | 4.6       | 0.13     | 3.7       | 0.12     |
|                                                                | <i>Projection</i> | 119        | -210      |          | 4.2       | 0.21     | 3.4       | 0.2      |
|                                                                |                   |            | 176       | -240     |           | 4.2      | 0.18      | 3.4      |
| $E_{\text{gap}}(\text{DFT}) \cup E_{\text{gap}}(\text{exptl})$ | <i>magpie</i>     | 88         | 0.53      | 0.00036  | 1.1       | 0.00048  | 0.84      | 0.00048  |
|                                                                | <i>CompVec</i>    | 119        | 0.38      | 0.00046  | 1.3       | 0.00046  | 0.93      | 0.0007   |
|                                                                | <i>Oliyntyk</i>   | 176        | 0.56      | 0.00065  | 1.1       | 0.00086  | 0.8       | 0.00035  |
|                                                                | <i>Random</i>     | 88         | -0.12     |          | 1.5       | 0.0032   | 1.2       | 0.0023   |
|                                                                | <i>Projection</i> | 119        | -0.026    |          | 1.5       | 0.0039   | 1.2       | 0.0031   |
|                                                                |                   |            | 176       | -0.05    |           | 1.5      | 0.0024    | 1.2      |
| $E_{\text{gap}}(\text{DFT})$                                   | <i>magpie</i>     | 88         | 0.54      | 0.00061  | 1.1       | 0.00084  | 0.83      | 0.00087  |
|                                                                | <i>CompVec</i>    | 119        | 0.38      | 0.00036  | 1.3       | 0.00033  | 0.93      | 0.00057  |
|                                                                | <i>Oliyntyk</i>   | 176        | 0.57      | 0.00065  | 1.1       | 0.00092  | 0.8       | 0.001    |
|                                                                | <i>Random</i>     | 88         | -0.13     |          | 1.5       | 0.004    | 1.2       | 0.0027   |
|                                                                | <i>Projection</i> | 119        | -0.022    |          | 1.5       | 0.0059   | 1.2       | 0.0044   |
|                                                                |                   |            | 176       | -0.061   |           | 1.5      | 0.0054    | 1.2      |
| $E_{\text{gap}}(\text{exptl})$                                 | <i>magpie</i>     | 88         | 0.52      | 0.0045   | 0.98      | 0.0034   | 0.72      | 0.0027   |
|                                                                | <i>CompVec</i>    | 119        | 0.28      | 0.0033   | 1.2       | 0.00064  | 0.79      | 0.0014   |
|                                                                | <i>Oliyntyk</i>   | 176        | 0.6       | 0.0032   | 0.89      | 0.0024   | 0.67      | 0.0016   |
|                                                                | <i>Random</i>     | 88         | -0.6      |          | 1.4       | 0.008    | 1.1       | 0.0057   |
|                                                                | <i>Projection</i> | 119        | -0.54     |          | 1.5       | 0.0076   | 1.2       | 0.0055   |
|                                                                |                   |            | 176       | -1.2     |           | 1.6      | 0.034     | 1.2      |
| $E_{\text{gap}}(\text{oxides})$                                | <i>magpie</i>     | 88         | 0.49      | 0.007    | 1.5       | 0.0058   | 1.2       | 0.0052   |
|                                                                | <i>CompVec</i>    | 119        | 0.3       | 0.0056   | 1.8       | 0.0057   | 1.4       | 0.0054   |
|                                                                | <i>Oliyntyk</i>   | 176        | 0.53      | 0.0046   | 1.4       | 0.004    | 1.1       | 0.0027   |
|                                                                | <i>Random</i>     | 88         | 0.22      | 0.018    | 2.0       | 0.021    | 1.6       | 0.019    |
|                                                                | <i>Projection</i> | 119        | 0.19      | 0.011    | 2.1       | 0.011    | 1.7       | 0.01     |
|                                                                |                   |            | 176       | 0.26     | 0.0041    | 2.0      | 0.0051    | 1.6      |
| $T_c   (T_c > 10\text{K})$                                     | <i>magpie</i>     | 88         | 0.45      | 0.026    | 14        | 0.048    | 9.3       | 0.053    |
|                                                                | <i>CompVec</i>    | 119        | 0.45      | 0.025    | 13        | 0.087    | 8.3       | 0.07     |
|                                                                | <i>Oliyntyk</i>   | 176        | 0.48      | 0.014    | 13        | 0.043    | 8.8       | 0.03     |
|                                                                | <i>Random</i>     | 88         | -16       |          | 21        | 0.29     | 17        | 0.28     |
|                                                                | <i>Projection</i> | 119        | -21       |          | 23        | 0.24     | 19        | 0.15     |
|                                                                |                   |            | 176       | -32      |           | 22       | 0.29      | 19       |
| $T_c$                                                          | <i>magpie</i>     | 88         | 0.39      | 0.0059   | 13        | 0.089    | 7.9       | 0.054    |
|                                                                | <i>CompVec</i>    | 119        | 0.48      | 0.0033   | 12        | 0.046    | 6.9       | 0.039    |
|                                                                | <i>Oliyntyk</i>   | 176        | 0.23      | 0.0096   | 13        | 0.07     | 8.2       | 0.038    |
|                                                                | <i>Random</i>     | 88         | -1.3      |          | 17        | 0.18     | 13        | 0.12     |
|                                                                | <i>Projection</i> | 119        | -0.97     |          | 16        | 0.14     | 13        | 0.12     |
|                                                                |                   |            | 176       | -0.99    |           | 17       | 0.11      | 13       |
| $\Delta T_x$                                                   | <i>magpie</i>     | 88         | -0.31     |          | 22        | 0.12     | 18        | 0.1      |
|                                                                | <i>CompVec</i>    | 119        | -0.092    |          | 21        | 0.15     | 17        | 0.12     |
|                                                                | <i>Oliyntyk</i>   | 176        | -0.19     |          | 21        | 0.13     | 17        | 0.098    |
|                                                                | <i>Random</i>     | 88         | -1.7      |          | 27        | 0.21     | 22        | 0.16     |
|                                                                | <i>Projection</i> | 119        | -0.52     |          | 23        | 0.12     | 18        | 0.063    |
|                                                                |                   |            | 176       | -0.66    |           | 23       | 0.17      | 19       |

Table S5: The mean ( $\bar{x}$ ) and standard deviation ( $\sigma$ ) of  $r^2$ , mean squared error (mse), root mean squared error (rmse) and mean absolute error (mae) of regression tasks across 5 repeats measured using LOCO-CV. As  $r^2$  has no lower bound, standard deviations of  $r^2$  were not included when calculating the standard deviation, where none of the repeats found an  $r^2 > 0$ , no standard deviation has been reported.

| task                                                           | CBFV              | dimensions | $r^2$     |          | rmse      |          | mae       |          |
|----------------------------------------------------------------|-------------------|------------|-----------|----------|-----------|----------|-----------|----------|
|                                                                |                   |            | $\bar{x}$ | $\sigma$ | $\bar{x}$ | $\sigma$ | $\bar{x}$ | $\sigma$ |
| $D_{\max}$                                                     | <i>magpie</i>     | 88         | 0.63      | 0.012    | 1.4       | 0.021    | 0.29      | 0.00081  |
|                                                                | <i>CompVec</i>    | 119        | 0.6       | 0.0075   | 1.4       | 0.0078   | 0.27      | 0.0021   |
|                                                                | <i>Oliynyk</i>    | 176        | 0.58      | 0.01     | 1.4       | 0.015    | 0.29      | 0.00075  |
|                                                                | <i>Random</i>     | 88         | -120      |          | 4.6       | 0.17     | 3.5       | 0.1      |
|                                                                | <i>Projection</i> | 119        | -61       |          | 4.1       | 0.18     | 3.1       | 0.099    |
|                                                                | <i>Projection</i> | 176        | -57       |          | 4.0       | 0.066    | 3.1       | 0.03     |
| $E_{\text{gap}}(\text{DFT}) \cup E_{\text{gap}}(\text{exptl})$ | <i>magpie</i>     | 88         | 0.77      | 0.00075  | 0.78      | 0.0012   | 0.54      | 0.00041  |
|                                                                | <i>CompVec</i>    | 119        | 0.71      | 0.001    | 0.87      | 0.0014   | 0.58      | 0.00049  |
|                                                                | <i>Oliynyk</i>    | 176        | 0.77      | 0.00044  | 0.77      | 0.00069  | 0.52      | 0.00039  |
|                                                                | <i>Random</i>     | 88         | 0.045     | 0.013    | 1.4       | 0.0084   | 1.1       | 0.0075   |
|                                                                | <i>Projection</i> | 119        | 0.1       | 0.0083   | 1.4       | 0.0085   | 1.1       | 0.0069   |
|                                                                | <i>Projection</i> | 176        | 0.083     | 0.0081   | 1.4       | 0.0056   | 1.1       | 0.0059   |
| $E_{\text{gap}}(\text{DFT})$                                   | <i>magpie</i>     | 88         | 0.77      | 0.00013  | 0.78      | 0.0002   | 0.53      | 0.00022  |
|                                                                | <i>CompVec</i>    | 119        | 0.72      | 0.00034  | 0.87      | 0.00049  | 0.57      | 0.00021  |
|                                                                | <i>Oliynyk</i>    | 176        | 0.78      | 0.00025  | 0.76      | 0.00042  | 0.52      | 0.00034  |
|                                                                | <i>Random</i>     | 88         | 0.04      | 0.0032   | 1.4       | 0.0074   | 1.1       | 0.0071   |
|                                                                | <i>Projection</i> | 119        | 0.11      | 0.01     | 1.4       | 0.0084   | 1.1       | 0.0082   |
|                                                                | <i>Projection</i> | 176        | 0.083     | 0.0087   | 1.4       | 0.0069   | 1.1       | 0.0069   |
| $E_{\text{gap}}(\text{exptl})$                                 | <i>magpie</i>     | 88         | 0.81      | 0.0014   | 0.65      | 0.0025   | 0.43      | 0.00097  |
|                                                                | <i>CompVec</i>    | 119        | 0.69      | 0.0022   | 0.83      | 0.0022   | 0.51      | 0.00069  |
|                                                                | <i>Oliynyk</i>    | 176        | 0.81      | 0.00078  | 0.64      | 0.0019   | 0.42      | 0.00094  |
|                                                                | <i>Random</i>     | 88         | -0.38     |          | 1.4       | 0.0054   | 1.1       | 0.0062   |
|                                                                | <i>Projection</i> | 119        | -0.43     |          | 1.5       | 0.01     | 1.1       | 0.01     |
|                                                                | <i>Projection</i> | 176        | -0.6      |          | 1.5       | 0.013    | 1.1       | 0.014    |
| $E_{\text{gap}}(\text{oxides})$                                | <i>magpie</i>     | 88         | 0.72      | 0.004    | 1.2       | 0.0067   | 0.91      | 0.0054   |
|                                                                | <i>CompVec</i>    | 119        | 0.51      | 0.0032   | 1.6       | 0.0049   | 1.2       | 0.0038   |
|                                                                | <i>Oliynyk</i>    | 176        | 0.75      | 0.0024   | 1.2       | 0.0046   | 0.87      | 0.0039   |
|                                                                | <i>Random</i>     | 88         | 0.24      | 0.011    | 2.0       | 0.021    | 1.6       | 0.022    |
|                                                                | <i>Projection</i> | 119        | 0.21      | 0.012    | 2.0       | 0.022    | 1.6       | 0.018    |
|                                                                | <i>Projection</i> | 176        | 0.26      | 0.015    | 2.0       | 0.024    | 1.6       | 0.02     |
| $T_c   (T_c > 10\text{K})$                                     | <i>magpie</i>     | 88         | 0.88      | 0.0003   | 10        | 0.012    | 6.4       | 0.0091   |
|                                                                | <i>CompVec</i>    | 119        | 0.87      | 0.0009   | 10        | 0.034    | 6.4       | 0.021    |
|                                                                | <i>Oliynyk</i>    | 176        | 0.88      | 0.00076  | 10        | 0.03     | 6.3       | 0.013    |
|                                                                | <i>Random</i>     | 88         | -16       |          | 21        | 0.12     | 17        | 0.074    |
|                                                                | <i>Projection</i> | 119        | -22       |          | 24        | 0.41     | 20        | 0.37     |
|                                                                | <i>Projection</i> | 176        | -39       |          | 23        | 0.35     | 19        | 0.26     |
| $T_c$                                                          | <i>magpie</i>     | 88         | 0.83      | 0.00083  | 11        | 0.028    | 5.6       | 0.013    |
|                                                                | <i>CompVec</i>    | 119        | 0.83      | 0.00062  | 11        | 0.021    | 5.3       | 0.011    |
|                                                                | <i>Oliynyk</i>    | 176        | 0.84      | 0.00077  | 11        | 0.026    | 5.5       | 0.0092   |
|                                                                | <i>Random</i>     | 88         | -1.4      |          | 17        | 0.11     | 13        | 0.08     |
|                                                                | <i>Projection</i> | 119        | -0.56     |          | 15        | 0.07     | 12        | 0.054    |
|                                                                | <i>Projection</i> | 176        | -0.92     |          | 18        | 0.14     | 13        | 0.077    |
| $\Delta T_x$                                                   | <i>magpie</i>     | 88         | 0.6       | 0.009    | 14        | 0.11     | 9.9       | 0.057    |
|                                                                | <i>CompVec</i>    | 119        | 0.64      | 0.011    | 14        | 0.11     | 9.3       | 0.057    |
|                                                                | <i>Oliynyk</i>    | 176        | 0.62      | 0.011    | 14        | 0.14     | 9.9       | 0.057    |
|                                                                | <i>Random</i>     | 88         | -1.5      |          | 27        | 0.18     | 22        | 0.18     |
|                                                                | <i>Projection</i> | 119        | -0.5      |          | 23        | 0.22     | 18        | 0.21     |
|                                                                | <i>Projection</i> | 176        | -0.68     |          | 23        | 0.11     | 19        | 0.13     |

Table S6: The mean ( $\bar{x}$ ) and standard deviation ( $\sigma$ ) of  $r^2$ , mean squared error (mse), root mean squared error (rmse) and mean absolute error (mae) of regression tasks across 5 repeats measured using LOCO-CV with radial basis function kernel. As  $r^2$  has no lower bound, values of  $r^2$  lower than 0 were excluded when calculating  $\sigma$ . Where none of the repeats found an  $r^2 > 0$ , no  $\sigma$  has been reported.



Table S7: Full table of results for the task of predicting  $T_c$ . Clusterings for LOCO-CV were done with *magpie* featurisation, and kernelised LOCO-CV was *magpie* featurisation with RBF kernel.

| 80%/20% train/test split  |            |       |     |      |      |
|---------------------------|------------|-------|-----|------|------|
| CBFV                      | dimensions | $r^2$ | mse | rmse | mae  |
| <i>magpie</i>             | 88         | 0.83  | 120 | 11.0 | 5.37 |
| <i>CompVec</i>            | 119        | 0.82  | 125 | 11.2 | 5.17 |
| <i>Stanev</i>             | 145        | 0.88  |     |      |      |
| <i>Oliynyk</i>            | 176        | 0.83  | 122 | 11.1 | 5.33 |
| <i>fractional</i>         | 476        | 0.82  | 130 | 11.4 | 5.24 |
| <i>RANDOM_200</i>         | 800        | 0.83  | 121 | 11.0 | 5.47 |
| <i>JARVIS</i>             | 1752       | 0.83  | 117 | 10.8 | 5.21 |
|                           | 88         | 0.81  | 134 | 11.6 | 5.88 |
|                           | 119        | 0.81  | 132 | 11.5 | 5.86 |
| <i>Random Projection</i>  | 176        | 0.80  | 140 | 11.8 | 5.97 |
|                           | 476        | 0.81  | 132 | 11.5 | 5.78 |
|                           | 800        | 0.82  | 129 | 11.4 | 5.74 |
|                           | 1752       | 0.82  | 128 | 11.3 | 5.71 |
| LOCO-CV scores            |            |       |     |      |      |
| CBFV                      | dimensions | $r^2$ | mse | rmse | mae  |
| <i>magpie</i>             | 88         | 0.39  | 199 | 12.7 | 7.89 |
| <i>CompVec</i>            | 119        | 0.48  | 192 | 12.1 | 6.91 |
| <i>Oliynyk</i>            | 176        | 0.25  | 204 | 13.0 | 8.18 |
| <i>fractional</i>         | 476        | 0.49  | 180 | 11.9 | 6.87 |
| <i>RANDOM_200</i>         | 800        | 0.49  | 177 | 11.9 | 7.28 |
| <i>JARVIS</i>             | 1752       | 0.44  | 197 | 12.4 | 7.77 |
| Kernelised LOCO-CV scores |            |       |     |      |      |
| CBFV                      | dimensions | $r^2$ | mse | rmse | mae  |
| <i>magpie</i>             | 88         | 0.83  | 127 | 11.2 | 5.59 |
| <i>CompVec</i>            | 119        | 0.83  | 123 | 11.1 | 5.32 |
| <i>Oliynyk</i>            | 176        | 0.84  | 120 | 10.9 | 5.50 |
| <i>fractional</i>         | 476        | 0.84  | 119 | 10.9 | 5.25 |
| <i>RANDOM_200</i>         | 800        | 0.84  | 119 | 10.9 | 5.60 |
| <i>JARVIS</i>             | 1752       | 0.85  | 114 | 10.7 | 5.36 |

Table S8: Full table of results for the task of predicting  $T_c|(T_c > 10 \text{ K})$ . Clusterings for LOCO-CV were done with *magpie* featurisation, and kernelised LOCO-CV was *magpie* featurisation with RBF kernel.

| 80%/20% train/test split  |            |       |      |      |      |
|---------------------------|------------|-------|------|------|------|
| CBFV                      | dimensions | $r^2$ | mse  | rmse | mae  |
| <i>magpie</i>             | 88         | 0.87  | 109  | 10.4 | 6.36 |
| <i>CompVec</i>            | 119        | 0.86  | 118  | 10.9 | 6.44 |
| <i>Stanev</i>             | 145        | 0.88  |      |      |      |
| <i>Oliynyk</i>            | 176        | 0.88  | 99.3 | 9.96 | 6.24 |
| <i>fractional</i>         | 476        | 0.87  | 108  | 10.4 | 6.26 |
| <i>RANDOM_200</i>         | 800        | 0.87  | 109  | 10.4 | 6.47 |
| <i>JARVIS</i>             | 1752       | 0.88  | 103  | 10.1 | 6.25 |
|                           | 88         | 0.84  | 134  | 11.6 | 7.05 |
|                           | 119        | 0.86  | 116  | 10.8 | 6.76 |
| <i>Random Projection</i>  | 176        | 0.85  | 124  | 11.1 | 6.82 |
|                           | 476        | 0.87  | 109  | 10.5 | 6.49 |
|                           | 800        | 0.86  | 113  | 10.6 | 6.66 |
|                           | 1752       | 0.86  | 119  | 10.9 | 6.70 |
| LOCO-CV scores            |            |       |      |      |      |
| CBFV                      | dimensions | $r^2$ | mse  | rmse | mae  |
| <i>magpie</i>             | 88         | 0.45  | 222  | 13.8 | 9.29 |
| <i>CompVec</i>            | 119        | 0.47  | 198  | 12.9 | 8.27 |
| <i>Oliynyk</i>            | 176        | 0.47  | 195  | 13.0 | 8.84 |
| <i>fractional</i>         | 476        | 0.50  | 183  | 12.3 | 8.01 |
| <i>RANDOM_200</i>         | 800        | 0.27  | 214  | 13.8 | 9.33 |
| <i>JARVIS</i>             | 1752       | 0.44  | 197  | 13.1 | 8.87 |
| Kernelised LOCO-CV scores |            |       |      |      |      |
| CBFV                      | dimensions | $r^2$ | mse  | rmse | mae  |
| <i>magpie</i>             | 88         | 0.88  | 105  | 10.2 | 6.42 |
| <i>CompVec</i>            | 119        | 0.88  | 108  | 10.4 | 6.36 |
| <i>Oliynyk</i>            | 176        | 0.88  | 103  | 10.1 | 6.35 |
| <i>fractional</i>         | 476        | 0.88  | 103  | 10.1 | 6.22 |
| <i>RANDOM_200</i>         | 800        | 0.87  | 109  | 10.4 | 6.57 |
| <i>JARVIS</i>             | 1752       | 0.89  | 98.7 | 9.92 | 6.24 |

Table S9: Full table of results for the task of predicting  $T_c > 10$  K. Clusterings for LOCO-CV were done with *magpie* featurisation, and kernelised LOCO-CV was *magpie* featurisation with RBF kernel.

| 80%/20% train/test split  |            |          |      |           |        |
|---------------------------|------------|----------|------|-----------|--------|
| CBFV                      | dimensions | accuracy | f1   | precision | recall |
| <i>magpie</i>             | 88         | 0.92     | 0.92 | 0.92      | 0.92   |
| <i>CompVec</i>            | 119        | 0.92     | 0.92 | 0.92      | 0.92   |
| <i>Stanev</i>             | 145        | 0.91     | 0.89 | 0.87      | 0.92   |
| <i>Oliynyk</i>            | 176        | 0.92     | 0.92 | 0.92      | 0.92   |
| <i>fractional</i>         | 476        | 0.92     | 0.92 | 0.92      | 0.92   |
| <i>RANDOM_200</i>         | 800        | 0.92     | 0.92 | 0.92      | 0.92   |
| <i>JARVIS</i>             | 1752       | 0.92     | 0.92 | 0.92      | 0.92   |
|                           | 88         | 0.91     | 0.91 | 0.91      | 0.91   |
|                           | 119        | 0.91     | 0.91 | 0.91      | 0.91   |
| <i>Random Projection</i>  | 176        | 0.91     | 0.91 | 0.91      | 0.91   |
|                           | 476        | 0.91     | 0.91 | 0.91      | 0.91   |
|                           | 800        | 0.91     | 0.91 | 0.91      | 0.91   |
|                           | 1752       | 0.91     | 0.91 | 0.91      | 0.91   |
| LOCO-CV scores            |            |          |      |           |        |
| CBFV                      | dimensions | accuracy | f1   | precision | recall |
| <i>magpie</i>             | 88         | 0.82     | 0.81 | 0.82      | 0.82   |
| <i>CompVec</i>            | 119        | 0.84     | 0.83 | 0.84      | 0.84   |
| <i>Oliynyk</i>            | 176        | 0.82     | 0.80 | 0.81      | 0.82   |
| <i>fractional</i>         | 476        | 0.83     | 0.82 | 0.83      | 0.83   |
| <i>RANDOM_200</i>         | 800        | 0.82     | 0.80 | 0.81      | 0.82   |
| <i>JARVIS</i>             | 1752       | 1.0      | 1.0  | 1.0       | 1.0    |
| Kernelised LOCO-CV scores |            |          |      |           |        |
| CBFV                      | dimensions | accuracy | f1   | precision | recall |
| <i>magpie</i>             | 88         | 0.91     | 0.91 | 0.91      | 0.91   |
| <i>CompVec</i>            | 119        | 0.91     | 0.91 | 0.91      | 0.91   |
| <i>Oliynyk</i>            | 176        | 0.91     | 0.91 | 0.91      | 0.91   |
| <i>fractional</i>         | 476        | 0.91     | 0.91 | 0.91      | 0.91   |
| <i>RANDOM_200</i>         | 800        | 0.91     | 0.91 | 0.91      | 0.91   |
| <i>JARVIS</i>             | 1752       | 1.0      | 1.0  | 1.0       | 1.0    |

Table S10: Full table of results for the task of predicting HH stability. Clusterings for LOCO-CV were done with *magpie* featurisation, and kernelised LOCO-CV was *magpie* featurisation with RBF kernel.

| 80%/20% train/test split |            |          |      |           |        |
|--------------------------|------------|----------|------|-----------|--------|
| CBFV                     | dimensions | accuracy | f1   | precision | recall |
| LeGrain                  | 51         | 0.99     | 0.99 | 0.99      | 0.99   |
| <i>magpie</i>            | 88         | 1.0      | 0.99 | 1.0       | 1.0    |
| <i>CompVec</i>           | 119        | 0.99     | 0.99 | 0.99      | 0.99   |
| <i>Oliynyk</i>           | 176        | 0.99     | 0.99 | 0.99      | 0.99   |
| <i>fractional</i>        | 476        | 0.99     | 0.99 | 0.99      | 0.99   |
| <i>RANDOM_200</i>        | 800        | 0.99     | 0.99 | 0.99      | 0.99   |
| <i>JARVIS</i>            | 1752       | 1.0      | 1.0  | 1.0       | 1.0    |
|                          | 88         | 0.99     | 0.99 | 0.99      | 0.99   |
|                          | 119        | 0.99     | 0.98 | 0.99      | 0.99   |
| <i>Random Projection</i> | 176        | 0.99     | 0.99 | 0.99      | 0.99   |
|                          | 476        | 0.99     | 0.98 | 0.99      | 0.99   |
|                          | 800        | 0.99     | 0.99 | 0.99      | 0.99   |
|                          | 1752       | 0.99     | 0.98 | 0.99      | 0.99   |

### S3.2 Materials screening for the discovery of new half-Heuslers: Machine learning versus ab initio Methods

This paper uses random forests to predict whether a half-heusler is stable or unstable using a custom made descriptor containing structural information of a compound [5]. The dataset they use contains 164 stable vs 11022 unstable half-heuslers which introduces some difficulties when applying LOCO-CV.

A dataset which is overwhelmingly one class is no longer suitable for LOCO-CV measurements as it is possible for all of the outlier class will lie in one cluster, which breaks many metric formulae which require all classes to have at least one example to avoid division by zero. For example in binary classification the specificity can be measured by

$$\text{Specificity} = \frac{tn}{N}$$

where  $tn$  is the number of true negative predictions and  $N$  is the total number of negative observations in the dataset. Where  $N = 0$ , even if you were to tweak the formula to stop division by zero (such as by adding a small number to the denominator), such a metric would be meaningless. We found that LOCO-CV failed to run due to all of the classes ending up in one cluster for all featurisation methods.

While LOCO-CV will not allow for extrapolatory measures of algorithms trained on these data, given a random split it is highly unlikely that all stable heuslers end up in test dataset. As such, we measured performance of our chosen CBFVs for comparison to the featurisation used in this case study. F1 score and precision were considered the most important metrics for success, as the unbalanced nature of the dataset makes accuracy and recall are approximately 1 for all models measured. CBFVs with domain knowledge resulted in more precise predictions than both the structural representation used by in this paper and representations without domain knowledge (table S10).

This is in contrast to previous suggestions that there would be little benefit for domain knowledge in CBFVs for a dataset of this size [6], however, those findings had no stipulations on dataset balance, which likely affected results. CBFVs with domain knowledge outperforming the representation used in this case study is surprising given that CBFVs are made using no structural information, suggesting that just because a representation *should* contain more knowledge does not mean such a representation will outperform others without such information.

### S3.3 Data-driven discovery of photoactive quaternary oxides using first-principles machine learning

This case study predicts band gaps found in the Computational Materials Repository database, using the 799 oxides as training/test data [2]. The representation used in the paper is a CBFV of 148 features generated with matminer, most (132) of which are derived from the magpie descriptors, with the rest constituting information on the highest occupied molecular orbital and lowest unoccupied molecular orbital, norms of stoichiometric attributes, ionic properties (including maximum and average ionic character between two atoms), and an estimation of absolute position of band centre. Some of these features are repetitions of those in the magpie feature set for example the average number of s, p, d, and f valence electrons. The aggregation functions implemented included the mean mean absolute deviation and modal value for magpie descriptors as well as the mean, sum, range, and variance of magpie descriptors which are used in previous work (and the main text of this work).

The representation used in this study resulted in better predictions than those found using no domain knowledge, performing equivalently to other CBFVs with domain knowledge, and performing significantly better in LOCO-CV measurements (table S11). This would fit the suggestion that inclusion of domain knowledge improves performance for ML methods when dataset size is smaller than 1000. It is notable that the representation used in this study did not outperform *magpie* as implemented for this and previous work[6]. This suggests that including the aggregation functions mode and mean absolute deviation of a feature does not meaningfully impact performance.

### S3.4 A machine learning approach for engineering bulk metallic glass alloys

This study uses ensemble learning methods for three separate prediction tasks related to the engineering of bulk metallic glass alloys (BMG) [9]. The following are predicted:

- Glass Forming Ability (GFA): predicting BMG’s ability to exist in an amorphous state.
- $D_{\max}$ : Predicting the critical casting diameter of a BMG.
- $\Delta T_x$ : The supercooled liquid range of a BMG.

The work uses a CBFV derived from the magpie descriptors with a total of more than 200 features, the exact number varying depending on prediction task. This is compared to the originally proposed 145 features [8] and the variant we use with 88 features [6]. This is applied to custom datasets collected from 41 different papers and one handbook, they used subsets of these for each task as GFA,  $D_{max}$ , and  $\Delta T_x$  were not available for all compounds.

Table S11: Full table of results for the task of predicting  $E_{\text{gap}}(\text{oxides})$ . Clusterings for LOCO-CV were done with *magpie* featurisation, and kernelised LOCO-CV was *magpie* featurisation with RBF kernel.

| 80%/20% train/test split  |            |       |       |       |       |
|---------------------------|------------|-------|-------|-------|-------|
| CBFV                      | dimensions | $r^2$ | mse   | rmse  | mae   |
| <i>magpie</i>             | 88         | 0.71  | 1.57  | 1.25  | 0.934 |
| <i>CompVec</i>            | 119        | 0.37  | 3.49  | 1.87  | 1.38  |
| Davies                    | 148        | 0.82  | 0.990 | 0.995 | 0.776 |
| <i>Oliyntyk</i>           | 176        | 0.77  | 1.26  | 1.12  | 0.854 |
| <i>fractional</i>         | 476        | 0.45  | 3.05  | 1.75  | 1.32  |
| <i>RANDOM_200</i>         | 800        | 0.42  | 3.22  | 1.79  | 1.41  |
| <i>JARVIS</i>             | 1752       | 0.70  | 1.68  | 1.30  | 0.945 |
|                           | 88         | 0.34  | 3.65  | 1.91  | 1.48  |
|                           | 119        | 0.27  | 4.01  | 2.00  | 1.58  |
| <i>Random Projection</i>  | 176        | 0.36  | 3.54  | 1.88  | 1.46  |
|                           | 476        | 0.37  | 3.46  | 1.86  | 1.42  |
|                           | 800        | 0.35  | 3.57  | 1.89  | 1.44  |
|                           | 1752       | 0.31  | 3.80  | 1.95  | 1.47  |
| LOCO-CV scores            |            |       |       |       |       |
| CBFV                      | dimensions | $r^2$ | mse   | rmse  | mae   |
| <i>magpie</i>             | 88         | 0.49  | 2.29  | 1.47  | 1.16  |
| <i>CompVec</i>            | 119        | 0.31  | 3.30  | 1.78  | 1.39  |
| <i>Oliyntyk</i>           | 176        | 0.53  | 2.05  | 1.40  | 1.10  |
| <i>fractional</i>         | 476        | 0.27  | 3.45  | 1.83  | 1.43  |
| <i>RANDOM_200</i>         | 800        | 0.23  | 3.51  | 1.85  | 1.47  |
| <i>JARVIS</i>             | 1752       | 0.50  | 2.19  | 1.47  | 1.16  |
| Davies                    | 148        | 0.58  | 1.79  | 1.32  | 1.01  |
| Kernelised LOCO-CV scores |            |       |       |       |       |
| CBFV                      | dimensions | $r^2$ | mse   | rmse  | mae   |
| <i>magpie</i>             | 88         | 0.73  | 1.44  | 1.20  | 0.908 |
| <i>CompVec</i>            | 119        | 0.52  | 2.56  | 1.59  | 1.17  |
| <i>Oliyntyk</i>           | 176        | 0.75  | 1.34  | 1.15  | 0.868 |
| <i>fractional</i>         | 476        | 0.52  | 2.55  | 1.59  | 1.18  |
| <i>RANDOM_200</i>         | 800        | 0.52  | 2.57  | 1.60  | 1.25  |
| <i>JARVIS</i>             | 1752       | 0.72  | 1.47  | 1.21  | 0.912 |
| Davies                    | 148        | 0.76  | 1.25  | 1.11  | 0.838 |

Table S12: Full table of results for the task of predicting  $\Delta T_x$ . Clusterings for LOCO-CV were done with *magpie* featurisation, and kernelised LOCO-CV was *magpie* featurisation with RBF kernel.

| 80%/20% train/test split  |            |        |      |      |      |
|---------------------------|------------|--------|------|------|------|
| CBFV                      | dimensions | $r^2$  | mse  | rmse | mae  |
| <i>magpie</i>             | 88         | 0.61   | 191  | 13.8 | 10.8 |
| <i>CompVec</i>            | 119        | 0.64   | 177  | 13.3 | 10.2 |
| <i>Oliytryk</i>           | 176        | 0.60   | 196  | 14.0 | 10.8 |
| <i>Ward</i>               | 213        | 0.68   | 159  | 12.6 | 9.80 |
| <i>fractional</i>         | 476        | 0.58   | 209  | 14.4 | 11.1 |
| <i>RANDOM_200</i>         | 800        | 0.59   | 202  | 14.2 | 11.1 |
| <i>JARVIS</i>             | 1752       | 0.61   | 193  | 13.9 | 10.8 |
| <i>Random Projection</i>  | 88         | 0.68   | 160  | 12.6 | 9.93 |
|                           | 119        | 0.65   | 172  | 13.1 | 10.3 |
|                           | 176        | 0.64   | 178  | 13.4 | 10.5 |
|                           | 476        | 0.67   | 163  | 12.8 | 10.1 |
|                           | 800        | 0.67   | 164  | 12.8 | 9.99 |
| 1752                      | 0.68       | 158    | 12.6 | 9.96 |      |
| LOCO-CV scores            |            |        |      |      |      |
| CBFV                      | dimensions | $r^2$  | mse  | rmse | mae  |
| <i>magpie</i>             | 88         | -0.29  | 524  | 22.2 | 17.8 |
| <i>CompVec</i>            | 119        | -0.11  | 450  | 20.9 | 16.8 |
| <i>Oliytryk</i>           | 176        | -0.20  | 478  | 21.4 | 17.3 |
| <i>Ward</i>               | 213        | -0.020 | 418  | 19.9 | 16.0 |
| <i>fractional</i>         | 476        | -0.19  | 471  | 21.5 | 16.9 |
| <i>RANDOM_200</i>         | 800        | -0.14  | 454  | 20.8 | 16.9 |
| <i>JARVIS</i>             | 1752       | -0.17  | 464  | 21.1 | 16.8 |
| Kernelised LOCO-CV scores |            |        |      |      |      |
| CBFV                      | dimensions | $r^2$  | mse  | rmse | mae  |
| <i>magpie</i>             | 88         | 0.59   | 212  | 14.4 | 9.99 |
| <i>CompVec</i>            | 119        | 0.63   | 195  | 13.8 | 9.45 |
| <i>Oliytryk</i>           | 176        | 0.61   | 202  | 14.1 | 9.94 |
| <i>Ward</i>               | 213        | 0.65   | 184  | 13.4 | 9.29 |
| <i>fractional</i>         | 476        | 0.60   | 208  | 14.3 | 9.92 |
| <i>RANDOM_200</i>         | 800        | 0.60   | 212  | 14.4 | 10.2 |
| <i>JARVIS</i>             | 1752       | 0.61   | 205  | 14.2 | 10.0 |

Table S13: Full table of results for the task of predicting  $D_{\max}$ . Clusterings for LOCO-CV were done with *magpie* featurisation, and kernelised LOCO-CV was *magpie* featurisation with RBF kernel.

| 80%/20% train/test split  |            |       |       |       |       |
|---------------------------|------------|-------|-------|-------|-------|
| CBFV                      | dimensions | $r^2$ | mse   | rmse  | mae   |
| <i>magpie</i>             | 88         | 0.69  | 0.904 | 0.951 | 0.271 |
| <i>CompVec</i>            | 119        | 0.64  | 1.06  | 1.03  | 0.271 |
| <i>Oliynyk</i>            | 176        | 0.60  | 1.17  | 1.08  | 0.289 |
| <i>Ward</i>               | 213        | 0.65  | 1.03  | 1.02  | 0.282 |
| <i>fractional</i>         | 476        | 0.61  | 1.12  | 1.06  | 0.286 |
| <i>RANDOM_200</i>         | 800        | 0.69  | 0.908 | 0.953 | 0.277 |
| <i>JARVIS</i>             | 1752       | 0.55  | 1.31  | 1.15  | 0.308 |
|                           | 88         | 0.57  | 1.29  | 1.14  | 0.407 |
|                           | 119        | 0.64  | 1.09  | 1.04  | 0.389 |
| <i>Random Projection</i>  | 176        | 0.62  | 1.13  | 1.06  | 0.377 |
|                           | 476        | 0.56  | 1.31  | 1.14  | 0.397 |
|                           | 800        | 0.59  | 1.21  | 1.10  | 0.399 |
|                           | 1752       | 0.61  | 1.16  | 1.08  | 0.385 |
| LOCO-CV scores            |            |       |       |       |       |
| CBFV                      | dimensions | $r^2$ | mse   | rmse  | mae   |
| <i>magpie</i>             | 88         | -15.  | 6.46  | 2.14  | 1.22  |
| <i>CompVec</i>            | 119        | -7.4  | 5.39  | 1.94  | 0.780 |
| <i>Oliynyk</i>            | 176        | -20.  | 8.49  | 2.54  | 1.55  |
| <i>Ward</i>               | 213        | -3.2  | 3.75  | 1.73  | 0.470 |
| <i>fractional</i>         | 476        | -9.1  | 5.21  | 1.92  | 0.758 |
| <i>RANDOM_200</i>         | 800        | -27.  | 10.9  | 2.77  | 1.54  |
| <i>JARVIS</i>             | 1752       | -50.  | 15.6  | 3.27  | 2.07  |
| Kernelised LOCO-CV scores |            |       |       |       |       |
| CBFV                      | dimensions | $r^2$ | mse   | rmse  | mae   |
| <i>magpie</i>             | 88         | 0.62  | 2.11  | 1.37  | 0.292 |
| <i>CompVec</i>            | 119        | 0.59  | 2.47  | 1.44  | 0.276 |
| <i>Oliynyk</i>            | 176        | 0.57  | 2.45  | 1.46  | 0.299 |
| <i>Ward</i>               | 213        | 0.64  | 2.06  | 1.34  | 0.273 |
| <i>fractional</i>         | 476        | 0.61  | 2.32  | 1.40  | 0.285 |
| <i>RANDOM_200</i>         | 800        | 0.57  | 2.54  | 1.47  | 0.308 |
| <i>JARVIS</i>             | 1752       | 0.57  | 2.50  | 1.47  | 0.311 |

Table S14: Full table of results for the task of predicting GFA. Clusterings for LOCO-CV were done with *magpie* featurisation, and kernelised LOCO-CV was *magpie* featurisation with RBF kernel.

| 80%/20% train/test split  |            |          |      |           |        |
|---------------------------|------------|----------|------|-----------|--------|
| CBFV                      | dimensions | accuracy | f1   | precision | recall |
| <i>magpie</i>             | 88         | 0.88     | 0.88 | 0.88      | 0.88   |
| <i>CompVec</i>            | 119        | 0.88     | 0.88 | 0.88      | 0.88   |
| <i>Oliytryk</i>           | 176        | 0.88     | 0.88 | 0.88      | 0.88   |
| <i>Ward</i>               | 213        | 0.89     | 0.89 | 0.89      | 0.89   |
| <i>fractional</i>         | 476        | 0.87     | 0.87 | 0.87      | 0.87   |
| <i>RANDOM_200</i>         | 800        | 0.87     | 0.87 | 0.87      | 0.87   |
| <i>JARVIS</i>             | 1752       | 0.89     | 0.89 | 0.89      | 0.89   |
|                           | 119        | 0.87     | 0.86 | 0.87      | 0.87   |
|                           | 176        | 0.87     | 0.87 | 0.87      | 0.87   |
| <i>Random Projection</i>  | 476        | 0.87     | 0.87 | 0.87      | 0.87   |
|                           | 800        | 0.87     | 0.87 | 0.87      | 0.87   |
|                           | 1752       | 0.87     | 0.87 | 0.87      | 0.87   |
| LOCO-CV scores            |            |          |      |           |        |
| CBFV                      | dimensions | accuracy | f1   | precision | recall |
| <i>magpie</i>             | 88         | 0.64     | 0.64 | 0.70      | 0.64   |
| <i>CompVec</i>            | 119        | 0.73     | 0.72 | 0.74      | 0.73   |
| <i>Oliytryk</i>           | 176        | 0.65     | 0.66 | 0.71      | 0.65   |
| <i>Ward</i>               | 213        | 0.74     | 0.74 | 0.77      | 0.74   |
| <i>fractional</i>         | 476        | 0.66     | 0.66 | 0.72      | 0.66   |
| <i>RANDOM_200</i>         | 800        | 0.63     | 0.61 | 0.70      | 0.63   |
| <i>JARVIS</i>             | 1752       | 0.56     | 0.57 | 0.71      | 0.56   |
| Kernelised LOCO-CV scores |            |          |      |           |        |
| CBFV                      | dimensions | accuracy | f1   | precision | recall |
| <i>magpie</i>             | 88         | 0.88     | 0.88 | 0.88      | 0.88   |
| <i>CompVec</i>            | 119        | 0.88     | 0.88 | 0.88      | 0.88   |
| <i>Oliytryk</i>           | 176        | 0.88     | 0.88 | 0.88      | 0.88   |
| <i>Ward</i>               | 213        | 0.88     | 0.88 | 0.88      | 0.88   |
| <i>fractional</i>         | 476        | 0.87     | 0.87 | 0.87      | 0.87   |
| <i>RANDOM_200</i>         | 800        | 0.87     | 0.87 | 0.87      | 0.87   |
| <i>JARVIS</i>             | 1752       | 0.88     | 0.88 | 0.88      | 0.88   |



Table S15: Full table of results for the task of predicting  $E_{\text{gap}}(\text{exptl})$ . Clusterings for LOCO-CV were done with *maggie* featurisation, and kernelised LOCO-CV was *maggie* featurisation with RBF kernel.

| 80%/20% train/test split  |            |       |       |       |       |
|---------------------------|------------|-------|-------|-------|-------|
| CBFV                      | dimensions | $r^2$ | mse   | rmse  | mae   |
| <i>maggie</i>             | 88         | 0.85  | 0.394 | 0.628 | 0.433 |
| <i>CompVec</i>            | 119        | 0.68  | 0.829 | 0.910 | 0.558 |
| <i>Oliyntyk</i>           | 176        | 0.85  | 0.397 | 0.630 | 0.422 |
| <i>fractional</i>         | 476        | 0.75  | 0.633 | 0.796 | 0.513 |
| <i>RANDOM_200</i>         | 800        | 0.63  | 0.947 | 0.973 | 0.575 |
| <i>JARVIS</i>             | 1752       | 0.85  | 0.394 | 0.628 | 0.421 |
| <i>Random Projection</i>  | 88         | 0.51  | 1.27  | 1.13  | 0.680 |
|                           | 119        | 0.57  | 1.11  | 1.05  | 0.647 |
|                           | 176        | 0.62  | 0.986 | 0.993 | 0.639 |
|                           | 476        | 0.59  | 1.06  | 1.03  | 0.623 |
|                           | 800        | 0.61  | 1.00  | 1.00  | 0.619 |
| 1752                      | 0.60       | 1.04  | 1.02  | 0.623 |       |
| LOCO-CV scores            |            |       |       |       |       |
| CBFV                      | dimensions | $r^2$ | mse   | rmse  | mae   |
| <i>maggie</i>             | 88         | 0.52  | 0.982 | 0.978 | 0.721 |
| <i>CompVec</i>            | 119        | 0.32  | 1.40  | 1.17  | 0.814 |
| <i>Oliyntyk</i>           | 176        | 0.60  | 0.810 | 0.892 | 0.673 |
| <i>fractional</i>         | 476        | 0.35  | 1.33  | 1.14  | 0.807 |
| <i>RANDOM_200</i>         | 800        | 0.38  | 1.29  | 1.12  | 0.828 |
| <i>JARVIS</i>             | 1752       | 0.56  | 0.899 | 0.937 | 0.687 |
| Kernelised LOCO-CV scores |            |       |       |       |       |
| CBFV                      | dimensions | $r^2$ | mse   | rmse  | mae   |
| <i>maggie</i>             | 88         | 0.81  | 0.420 | 0.645 | 0.434 |
| <i>CompVec</i>            | 119        | 0.66  | 0.765 | 0.871 | 0.535 |
| <i>Oliyntyk</i>           | 176        | 0.81  | 0.416 | 0.641 | 0.424 |
| <i>fractional</i>         | 476        | 0.71  | 0.648 | 0.802 | 0.501 |
| <i>RANDOM_200</i>         | 800        | 0.64  | 0.825 | 0.904 | 0.566 |
| <i>JARVIS</i>             | 1752       | 0.82  | 0.395 | 0.626 | 0.418 |

When recreating these tasks with RFs rather than the ensemble learning methods used here, in regression tasks ( $D_{max}$  and  $\Delta T_x$  prediction), marginally outperform the representations we investigate in section 3.1 in some metrics (table tables S12 and S13). The performance difference between the representation used in this work and the other CBFVs investigated (both with and without domain knowledge) was significantly smaller in the  $D_{max}$  dataset. This fits previous findings that specialised domain knowledge becomes less important as dataset size increases [6], as the  $D_{max}$  training dataset size was almost an order of magnitude larger than that of the  $\Delta T_x$  (4725 and 497 respectively). Regardless of the CBFV used all RFs failed to predict reliably in LOCO-CV, suggesting an RF is not suitable for extrapolation in this task (tables S12 and S13).

In recreation of the GFA classification task, the representation used in this study performed similarly to other CBFV’s investigated (table S14). This fits with the hypothesis that for larger datasets CBFV domain knowledge becomes less important with size as the training dataset was size 5053.

### S3.5 Extracting knowledge from DFT: Experimental band gap predictions through ensemble learning

This work focuses on the use of neural networks to predict DFT calculated band gaps and transferring this knowledge to retrain them on a smaller set of experimental measurements, finding the transfer learning to be advantageous [4]. They use *maggie* featurisation on DFT data extracted from the Materials project and AFLOW as well as experimental data compiled in previous work [3][1][10].

As the transfer learning approach used in the case study is not applicable to RFs, in recreating this case study we considered this to be 3 separate datasets:

- $E_{\text{gap}}(\text{DFT})$ : Predicting the band gap of materials calculated using DFT.

Table S16: Full table of results for the task of predicting  $E_{\text{gap}}(\text{DFT})$ . Clusterings for LOCO-CV were done with *magpie* featurisation, and kernelised LOCO-CV was *magpie* featurisation with RBF kernel.

| 80%/20% train/test split  |            |       |       |       |       |
|---------------------------|------------|-------|-------|-------|-------|
| CBFV                      | dimensions | $r^2$ | mse   | rmse  | mae   |
| <i>magpie</i>             | 88         | 0.77  | 0.621 | 0.788 | 0.523 |
| <i>CompVec</i>            | 119        | 0.66  | 0.922 | 0.960 | 0.663 |
| <i>Oliynyk</i>            | 176        | 0.78  | 0.605 | 0.778 | 0.513 |
| <i>fractional</i>         | 476        | 0.71  | 0.790 | 0.889 | 0.552 |
| <i>RANDOM_200</i>         | 800        | 0.70  | 0.819 | 0.905 | 0.616 |
| <i>JARVIS</i>             | 1752       | 0.79  | 0.572 | 0.756 | 0.502 |
|                           | 88         | 0.54  | 1.23  | 1.11  | 0.841 |
|                           | 119        | 0.54  | 1.23  | 1.11  | 0.839 |
| <i>Random Projection</i>  | 176        | 0.56  | 1.18  | 1.09  | 0.819 |
|                           | 476        | 0.59  | 1.11  | 1.05  | 0.796 |
|                           | 800        | 0.60  | 1.09  | 1.04  | 0.790 |
|                           | 1752       | 0.61  | 1.04  | 1.02  | 0.769 |
| LOCO-CV scores            |            |       |       |       |       |
| CBFV                      | dimensions | $r^2$ | mse   | rmse  | mae   |
| <i>magpie</i>             | 88         | 0.54  | 1.19  | 1.09  | 0.833 |
| <i>CompVec</i>            | 119        | 0.32  | 1.77  | 1.32  | 0.988 |
| <i>Oliynyk</i>            | 176        | 0.57  | 1.12  | 1.05  | 0.803 |
| <i>fractional</i>         | 476        | 0.40  | 1.56  | 1.24  | 0.922 |
| <i>RANDOM_200</i>         | 800        | 0.42  | 1.51  | 1.22  | 0.953 |
| <i>JARVIS</i>             | 1752       | 0.58  | 1.08  | 1.03  | 0.795 |
| Kernelised LOCO-CV scores |            |       |       |       |       |
| CBFV                      | dimensions | $r^2$ | mse   | rmse  | mae   |
| <i>magpie</i>             | 88         | 0.77  | 0.608 | 0.779 | 0.533 |
| <i>CompVec</i>            | 119        | 0.63  | 0.982 | 0.991 | 0.686 |
| <i>Oliynyk</i>            | 176        | 0.78  | 0.584 | 0.764 | 0.520 |
| <i>fractional</i>         | 476        | 0.73  | 0.708 | 0.841 | 0.561 |
| <i>RANDOM_200</i>         | 800        | 0.71  | 0.763 | 0.873 | 0.634 |
| <i>JARVIS</i>             | 1752       | 0.79  | 0.556 | 0.745 | 0.510 |

Table S17: Full table of results for the task of predicting  $E_{\text{gap}}(\text{DFT}) \cup E_{\text{gap}}(\text{exptl})$ . Clustering for LOCO-CV were done with *magpie* featurisation, and kernelised LOCO-CV was *magpie* featurisation with RBF kernel.

| 80%/20% train/test split  |            |       |       |       |       |
|---------------------------|------------|-------|-------|-------|-------|
| CBFV                      | dimensions | $r^2$ | mse   | rmse  | mae   |
| <i>magpie</i>             | 88         | 0.77  | 0.602 | 0.776 | 0.524 |
| <i>CompVec</i>            | 119        | 0.63  | 0.955 | 0.977 | 0.673 |
| <i>Oliynyk</i>            | 176        | 0.78  | 0.581 | 0.762 | 0.513 |
| <i>fractional</i>         | 476        | 0.74  | 0.679 | 0.824 | 0.551 |
| <i>RANDOM_200</i>         | 800        | 0.73  | 0.728 | 0.853 | 0.614 |
| <i>JARVIS</i>             | 1752       | 0.79  | 0.555 | 0.745 | 0.504 |
|                           | 88         | 0.54  | 1.20  | 1.10  | 0.834 |
|                           | 119        | 0.54  | 1.20  | 1.10  | 0.834 |
| <i>Random Projection</i>  | 176        | 0.56  | 1.15  | 1.07  | 0.812 |
|                           | 476        | 0.58  | 1.08  | 1.04  | 0.788 |
|                           | 800        | 0.59  | 1.07  | 1.03  | 0.779 |
|                           | 1752       | 0.60  | 1.03  | 1.02  | 0.765 |
| LOCO-CV scores            |            |       |       |       |       |
| CBFV                      | dimensions | $r^2$ | mse   | rmse  | mae   |
| <i>magpie</i>             | 88         | 0.53  | 1.20  | 1.09  | 0.840 |
| <i>CompVec</i>            | 119        | 0.32  | 1.76  | 1.32  | 0.986 |
| <i>Oliynyk</i>            | 176        | 0.56  | 1.13  | 1.06  | 0.805 |
| <i>fractional</i>         | 476        | 0.39  | 1.56  | 1.24  | 0.925 |
| <i>RANDOM_200</i>         | 800        | 0.42  | 1.50  | 1.22  | 0.950 |
| <i>JARVIS</i>             | 1752       | 0.58  | 1.09  | 1.04  | 0.797 |
| Kernelised LOCO-CV scores |            |       |       |       |       |
| CBFV                      | dimensions | $r^2$ | mse   | rmse  | mae   |
| <i>magpie</i>             | 88         | 0.76  | 0.613 | 0.783 | 0.537 |
| <i>CompVec</i>            | 119        | 0.62  | 0.981 | 0.990 | 0.686 |
| <i>Oliynyk</i>            | 176        | 0.77  | 0.592 | 0.769 | 0.524 |
| <i>fractional</i>         | 476        | 0.72  | 0.721 | 0.849 | 0.567 |
| <i>RANDOM_200</i>         | 800        | 0.70  | 0.775 | 0.880 | 0.635 |
| <i>JARVIS</i>             | 1752       | 0.78  | 0.567 | 0.753 | 0.515 |

- $E_{\text{gap}}(\text{exptl})$ : Predicting the band gap of materials measured experimentally.
- $E_{\text{gap}}(\text{DFT}) \cup E_{\text{gap}}(\text{exptl})$ : Predicting the band gap of a dataset consisting of both DFT calculated and experimentally measured band gaps.

Experiments on which CBFV is most effective on these datasets showed that datasets  $E_{\text{gap}}(\text{exptl})$  and  $E_{\text{gap}}(\text{DFT}) \cup E_{\text{gap}}(\text{exptl})$  yielded similar results, which is logical as they are very similar datasets. In these datasets domain knowledge based CBFVs outperformed those without domain knowledge, with *JARVIS* slightly outperforming all other CBFVs (tables S16 and S17).

The larger datasets saw the performance difference caused by different CBFVs become smaller with the range of  $r^2$  between different CBFVs becoming 0.050 smaller (the range was 0.16, 0.15, and 0.21 in the datasets 1, 2, and 3 respectively). While a dataset size increase usually sees the benefit of domain knowledge decrease, here the decrease of that benefit is less. Here datasets of more than 35,000 compounds still showing a notable benefit to domain knowledge.

We also present a full tables of results this dataset (tables S15 to S17)

## References

- [1] Stefano Curtarolo, Wahyu Setyawan, Gus L.W. Hart, Michal Jahnatek, Roman V. Chepulskii, Richard H. Taylor, Shidong Wang, Junkai Xue, Kesong Yang, Ohad Levy, Michael J. Mehl, Harold T. Stokes, Denis O. Demchenko, and Dane Morgan. Aflow: An automatic framework for high-throughput materials discovery. *Computational Materials Science*, 58:218–226, 2012.
- [2] Daniel W. Davies, Keith T. Butler, and Aron Walsh. Data-Driven Discovery of Photoactive Quaternary Oxides Using First-Principles Machine Learning. *Chemistry of Materials*, 31(18):7221–7230, sep 2019.
- [3] Anubhav Jain, Shyue Ping Ong, Geoffroy Hautier, Wei Chen, William Davidson Richards, Stephen Dacek, Shreyas Cholia, Dan Gunter, David Skinner, Gerbrand Ceder, and Kristin a. Persson. The Materials Project: A materials genome approach to accelerating materials innovation. *APL Materials*, 1(1):011002, 2013.
- [4] Steven K Kauwe, Taylor Welker, and Taylor D Sparks. Extracting Knowledge from DFT: Experimental Band Gap Predictions Through Ensemble Learning. *Integrating Materials and Manufacturing Innovation*, 9(3):213–220, 2020.
- [5] Fleur Legrain, Jesús Carrete, Ambroise Van Roekeghem, Georg K.H. Madsen, and Natalio Mingo. Materials Screening for the Discovery of New Half-Heuslers: Machine Learning versus ab Initio Methods. *Journal of Physical Chemistry B*, 122(2):625–632, jan 2018.
- [6] Ryan J Murdock, Steven K Kauwe, Anthony Yu Tung Wang, and Taylor D. Sparks. Is Domain Knowledge Necessary for Machine Learning Materials Properties? *Integrating Materials and Manufacturing Innovation*, 9(3):221–227, 2020.
- [7] Valentin Stanev, Corey Oses, A. Gilad Kusne, Efrain Rodriguez, Johnpierre Paglione, Stefano Curtarolo, and Ichiro Takeuchi. Machine learning modeling of superconducting critical temperature. *npj Computational Materials*, 4(1):1–14, dec 2018.
- [8] Logan Ward, Ankit Agrawal, Alok Choudhary, and Christopher Wolverton. A general-purpose machine learning framework for predicting properties of inorganic materials. *npj Computational Materials*, 2(1):1–7, aug 2016.
- [9] Logan Ward, Stephanie C. O’Keeffe, Joseph Stevick, Glenton R. Jelbert, Muratahan Aykol, and Chris Wolverton. A machine learning approach for engineering bulk metallic glass alloys. *Acta Materialia*, 159:102–111, oct 2018.
- [10] Ya Zhuo, Aria Mansouri Tehrani, and Jakoah Brgoch. Predicting the band gaps of inorganic solids by machine learning. *The Journal of Physical Chemistry Letters*, 9(7):1668–1673, 2018. PMID: 29532658.
